# Supplementary material
Source: PubMed Central journal article supplement (PMC3548455)

## Figure Legends

Supplemental Figure 1: *Expression of AR increases with lesion progression in the aortic sinus of apo E-null mice.* Cross sections of aortic sinus obtained from 10-, 22- and 52-week old apoE-null mice, maintained on normal chow, were stained with anti-AR antibody. Digital images of the lesions were acquired at 10x magnification.

Supplemental Figure 2: *Inhibition of AR does not affect advanced atherosclerotic lesions.* ApoE-null mice (24-week old) were fed either sorbinil (0.2 g/L in 0.5% ethanol in drinking water; *Protocol IIB*) or vehicle II (0.5% ethanol in drinking water; *Protocol IIA*) for 12 weeks. Plasma cholesterol and triglycerides levels in sorbinil-fed mice were comparable with controls (see Supplemental Table 1). Lesion formation was examined in the aortic sinus (**A**) and in the aorta (**B**). Lipids were stained with Oil-Red O in the aortic sinus and Sudan IV in the aorta (*en face*).

Supplemental Figure 3: *Genetic ablation of AR does not affect cytokine production.* (**A**) Pro-inflammatory cytokines were measured in the spleen of 8-week old female AR<sup>+/+</sup>/apoE<sup>-/-</sup> and AR<sup>-/-</sup>/apoE<sup>-/-</sup> mice fed high-fat diet for 12 weeks (Protocol IV). All primers were validated to yield single specific band with conventional RT-PCR. Values obtained were normalized to GAPDH to calculate  $\Delta C(T)$  values. (**B**) Plasma IL-6 levels in AR<sup>+/+</sup>/apoE<sup>-/-</sup> and AR<sup>-/-</sup>/apoE<sup>-/-</sup> mice.

Supplemental Figure 4: Effect of genetic ablation of AR on MDA

accumulation. Eight week old female AR<sup>-/-</sup>/apoE<sup>-/-</sup> and AR<sup>+/+</sup>/apoE<sup>-/-</sup> mice were maintained on high-fat diet for 12 weeks (*Protocol IV*). Plasma MDA levels were measured by GC-MS as described under *Materials and Methods*. Panel **A** shows the representative chromatogram of MDA in the plasma of AR<sup>+/+</sup>/apoE<sup>-/-</sup> (i) and AR<sup>-/-</sup>/apoE<sup>-/-</sup> mice (ii) by select ion monitoring. Panel **B** shows the spectrum of select ions monitored for the quantification of MDA (ii and iv). Benzaldehyde ring D<sub>5</sub> (i and iii) was used as an internal standard for MDA quantification. Following ions were monitored for the indicated aldehyde: benzaldehyde ring D<sub>5</sub> - m/z 256 and 286 [M<sup>+</sup>-HFNO and M<sup>+</sup>-HF and MDA m/z 204 and 415 [M<sup>+</sup>- C<sub>7</sub>H<sub>2</sub>F<sub>5</sub>-HFNO-C<sub>2</sub>H<sub>3</sub> and M<sup>+</sup>- NO<sub>2</sub>]. Panel **C** shows group data of plasma aldehyde. Values are mean ± SEM. \*P<0.01 versus controls. Panel D shows the photomicrographs of sections of the innominate arteries stained with polyclonal anti-protein-MDA antibody. Sections treated with non-immune mouse IgG served as negative controls for staining.

Supplemental Figure 5: AR protects against atherogenesis in diabetic mice.

Diabetes was induced in mice by streptozotocin as described under *Methods*. (**A**) Inhibition by sorbinil (i) or genetic ablation of AR (ii) exacerbated lesion formation in the aortic arch after 6 weeks of diabetes. (**B**) After 12 weeks of diabetes, lesion formation was significantly increased in the aortic arch (i) and the abdominal aorta (ii) of AR<sup>-/-</sup>/apoE<sup>-/-</sup> when compared with AR<sup>+/+</sup>/apoE<sup>-/-</sup> mice. Lipids were

visualized by Sudan IV staining (*en face*). Values are mean  $\pm$  SEM. \*P<0.01 and #P<0.02 versus controls.

**Supplemental Table 1: Parameters measured in non-diabetic and diabetic mice.**

| Protocol No. | Genotype                               | Sex    | Treatment  | Diet | Study period (weeks) | Sorbitol (nmol/mg protein) | Cholesterol (mg/dl) | Triglycerides (mg/dl) | Blood Glucose (mg/dl) |
|--------------|----------------------------------------|--------|------------|------|----------------------|----------------------------|---------------------|-----------------------|-----------------------|
| Non-diabetic |                                        |        |            |      |                      |                            |                     |                       |                       |
| 1A           | apoE <sup>-/-</sup>                    | Male   | Vehicle I  | HF   | 8-12                 | 47±4                       | 888±78              | 102±9                 | ND                    |
| IB           | apoE <sup>-/-</sup>                    | Male   | +Tolrestat | HF   | 8-12                 | 14±1*                      | 828±36              | 93±9                  | ND                    |
| IC           | apoE <sup>-/-</sup>                    | Male   | Vehicle II | HF   | 8-12                 | 42±3                       | 853±33              | 115±24                | ND                    |
| ID           | apoE <sup>-/-</sup>                    | Male   | +Sorbinil  | HF   | 8-12                 | 9±1*                       | 854±28              | 87±16                 | ND                    |
|              |                                        |        |            |      |                      |                            |                     |                       |                       |
| IIA          | apoE <sup>-/-</sup>                    | Male   | Vehicle II | NC   | 24-36                | ND                         | 635±54              | 125±17                | ND                    |
| IIB          | apoE <sup>-/-</sup>                    | Male   | +Sorbinil  | NC   | 24-36                | ND                         | 618±28              | 114±17                | ND                    |
|              |                                        |        |            |      |                      |                            |                     |                       |                       |
| IIIA         | AR <sup>+/+</sup> /apoE <sup>-/-</sup> | Male   | -          | HF   | 8-12                 | ND                         | 806±59              | 109±11                | ND                    |
| IIIB         | AR <sup>-/-</sup> /apoE <sup>-/-</sup> | Male   | -          | HF   | 8-12                 | ND                         | 791±33              | 95±12                 | ND                    |
|              |                                        |        |            |      |                      |                            |                     |                       |                       |
| IVA          | AR <sup>+/+</sup> /apoE <sup>-/-</sup> | Male   | -          | HF   | 8-20                 | ND                         | 1350±101            | 151±15                | ND                    |
| IVB          | AR <sup>-/-</sup> /apoE <sup>-/-</sup> | Male   | -          | HF   | 8-20                 | ND                         | 1501±171            | 160±40                | ND                    |
| IVC          | AR <sup>+/+</sup> /apoE <sup>-/-</sup> | Female | -          | HF   | 8-20                 | ND                         | 1576±53             | 138±10                | ND                    |
| IVD          | AR <sup>-/-</sup> /apoE <sup>-/-</sup> | Female | -          | HF   | 8-20                 | ND                         | 1536±62             | 150±11                | ND                    |
|              |                                        |        |            |      |                      |                            |                     |                       |                       |
| Diabetic     |                                        |        |            |      |                      |                            |                     |                       |                       |
| VA           | apoE <sup>-/-</sup>                    | Male   | Vehicle II | NC   | 6-14                 | 125±9                      | 1409±95             | 101±10                | 444±8                 |
| VB           | apoE <sup>-/-</sup>                    | Male   | +Sorbinil  | NC   | 6-14                 | 40±3*                      | 1203±107            | 117±18                | 460±16                |
| VC           | AR <sup>+/+</sup> /apoE <sup>-/-</sup> | Male   | -          | NC   | 6-14                 | ND                         | 1504±120            | 89±9                  | 526±31                |
| VD           | AR <sup>-/-</sup> /apoE <sup>-/-</sup> | Male   | -          | NC   | 6-14                 | ND                         | 1491±160            | 89±15                 | 514±45                |
| VA           | AR <sup>+/+</sup> /apoE <sup>-/-</sup> | Male   | -          | NC   | 6-20                 | ND                         | 1260±76             | 102±9                 | 552±22                |
| VB           | AR <sup>-/-</sup> /apoE <sup>-/-</sup> | Male   | -          | NC   | 6-20                 | ND                         | 1315±132            | 110±15                | 539±30                |

Diabetes was induced by streptozotocin. Values are mean ± SEM. \*P<0.01 Protocols IB vs IA, ID vs IC and VB vs VA. HF-High fat; NC-Normal chow; ND-Not determined.

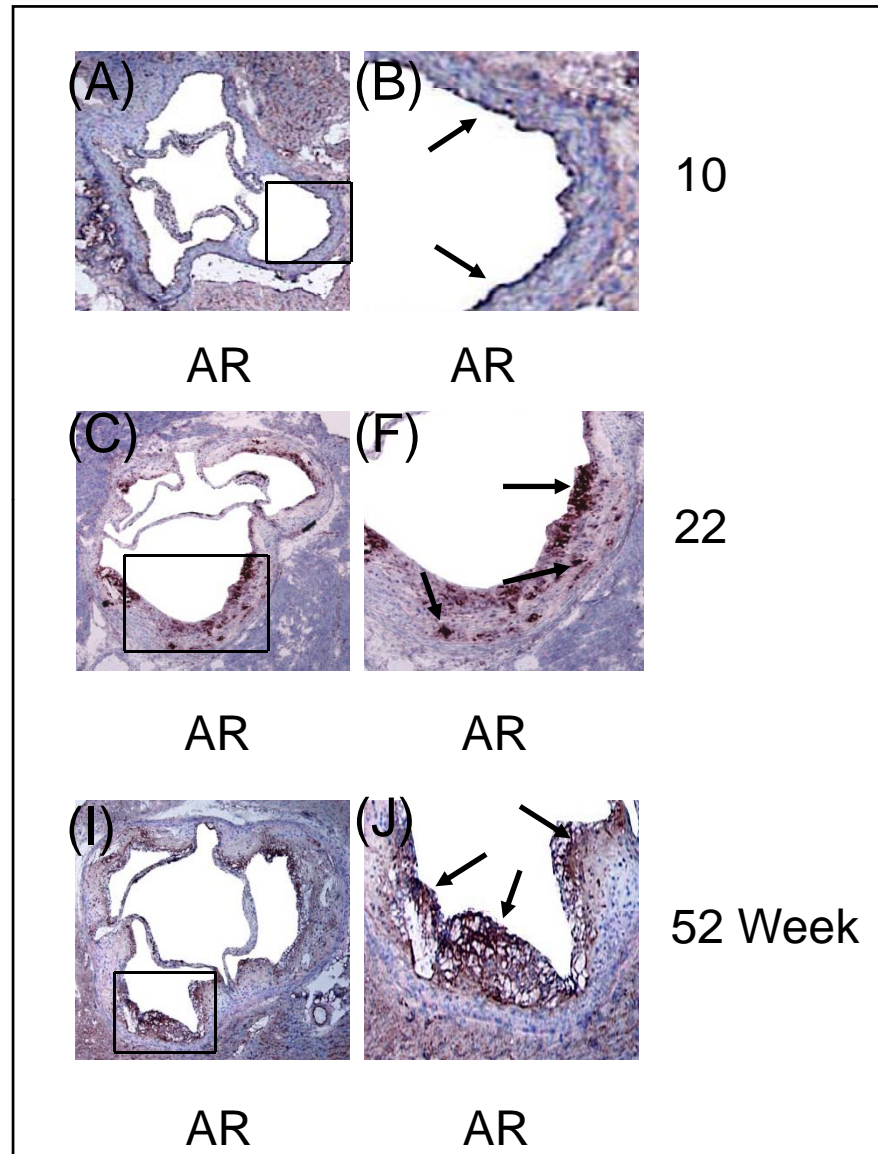

Supplemental Figure 2

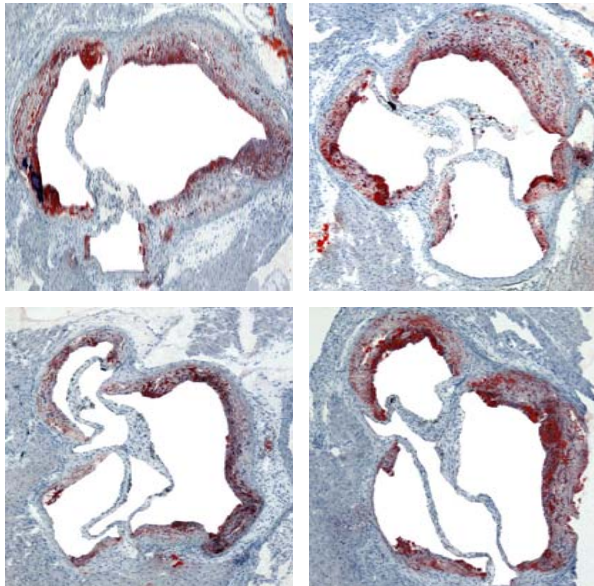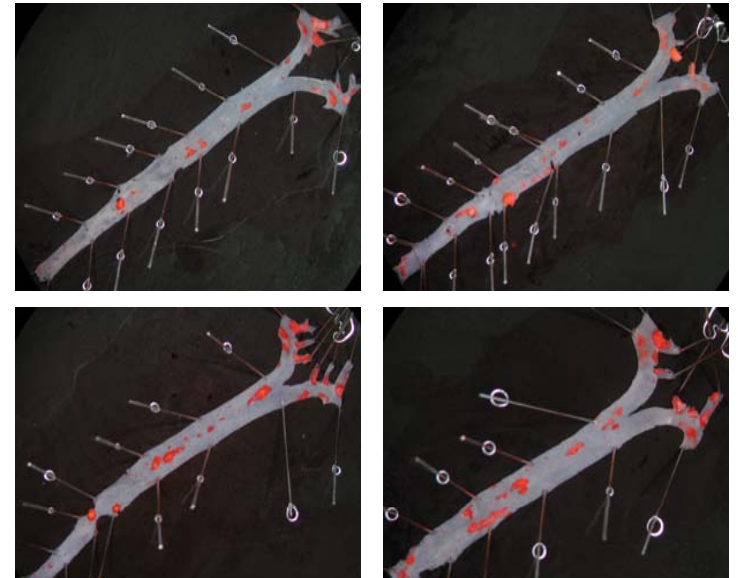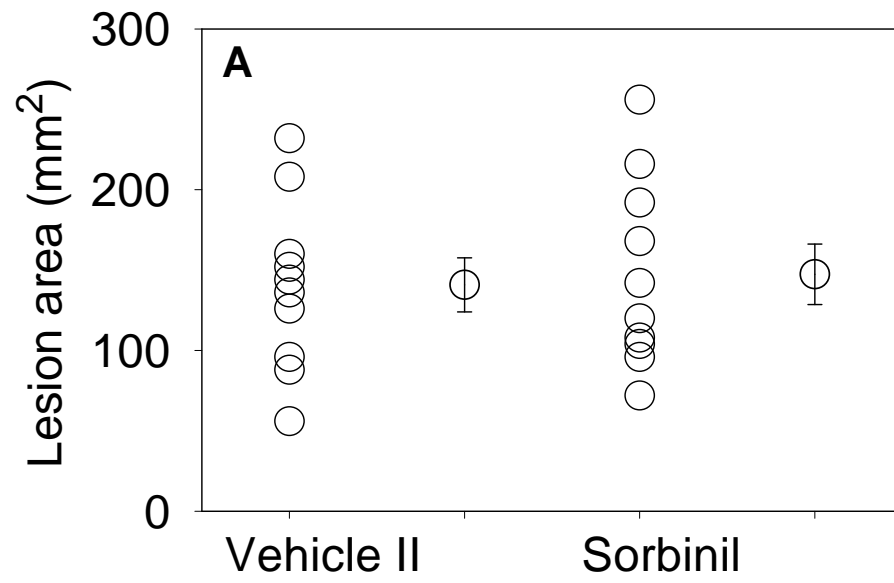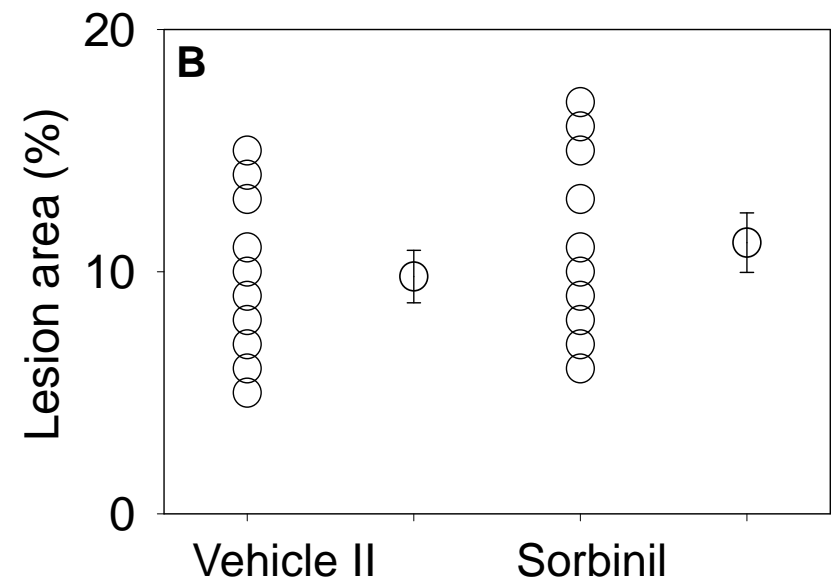

Supplemental Figure 3

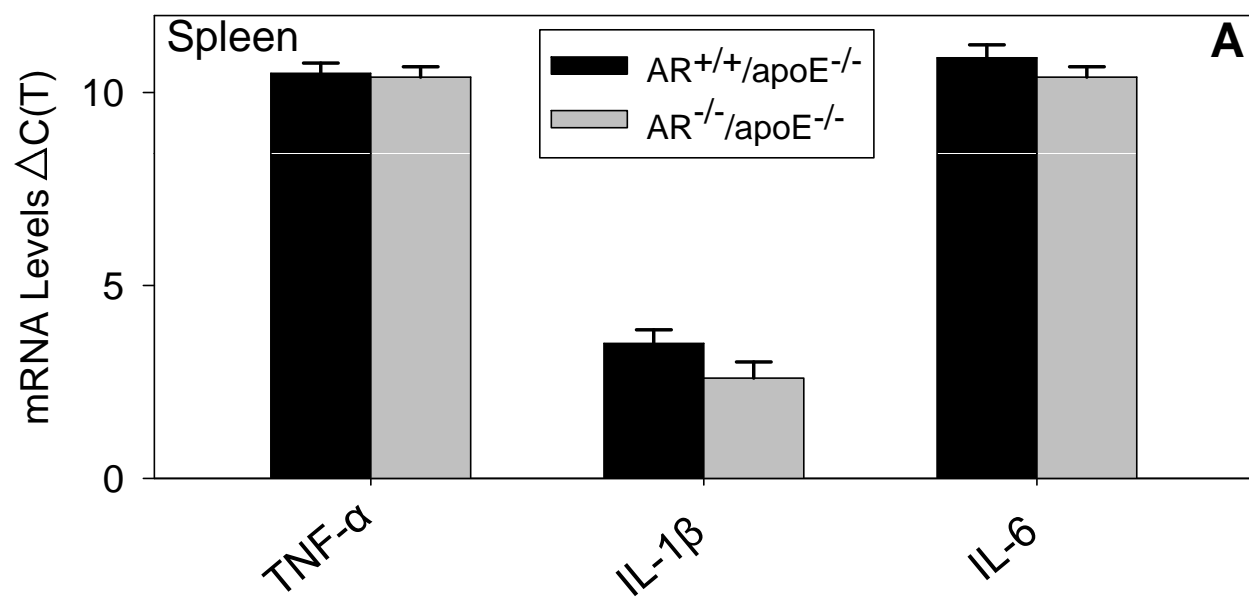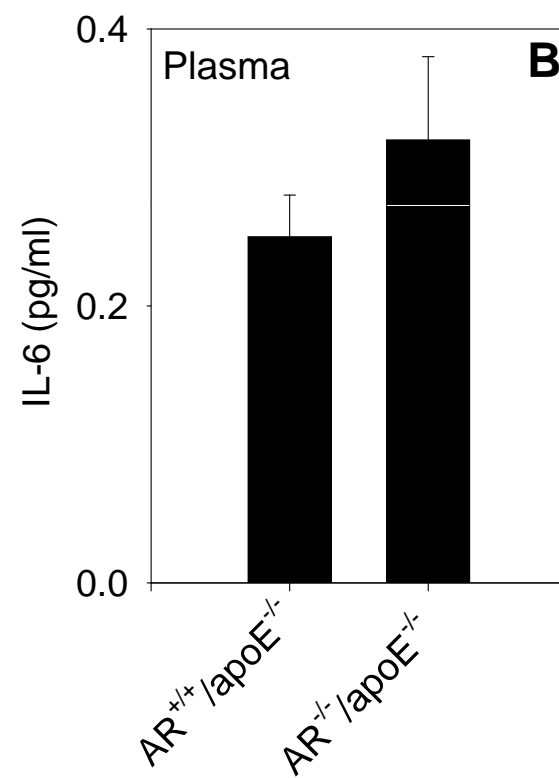

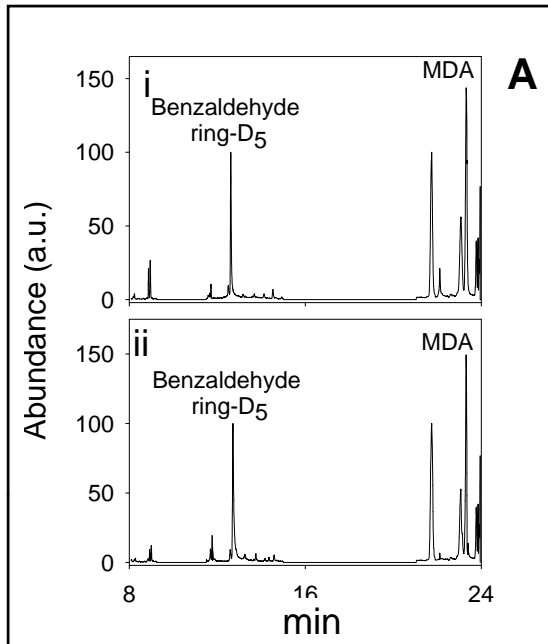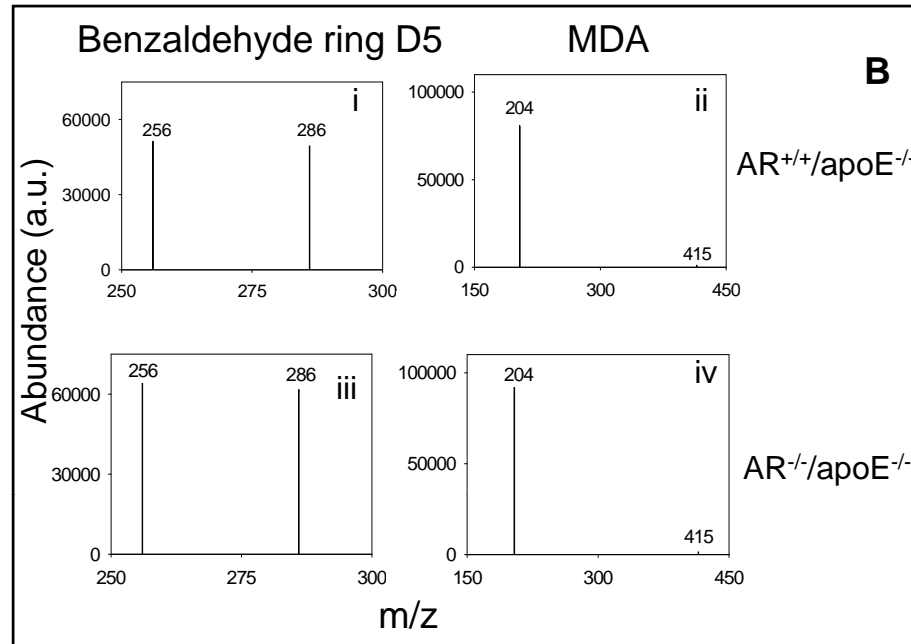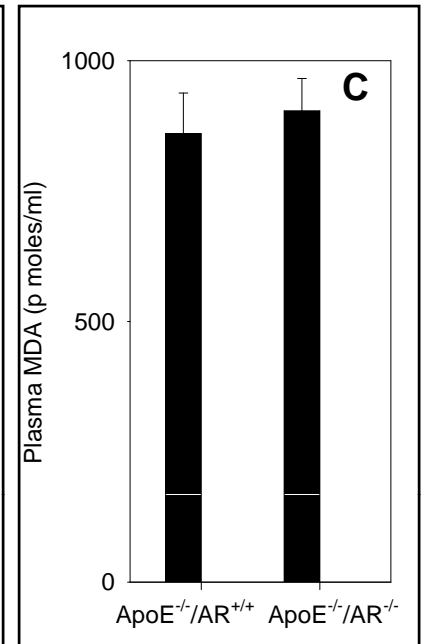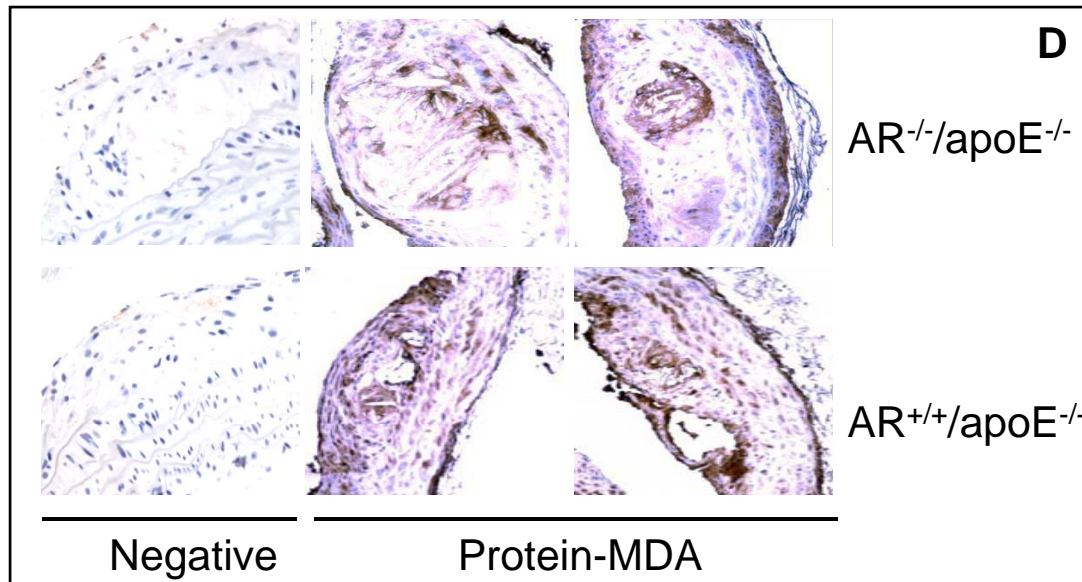



**6 Weeks**

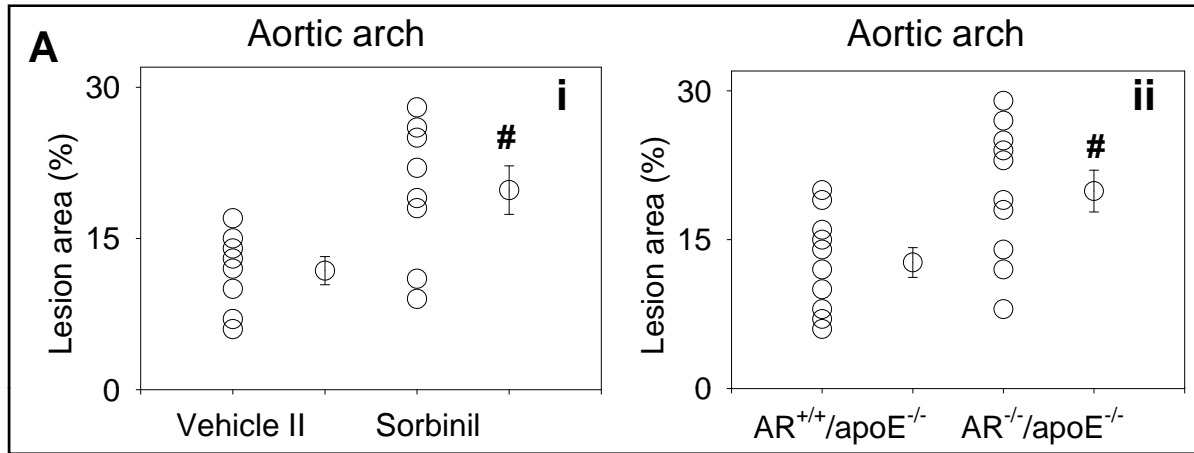

**12 Weeks**

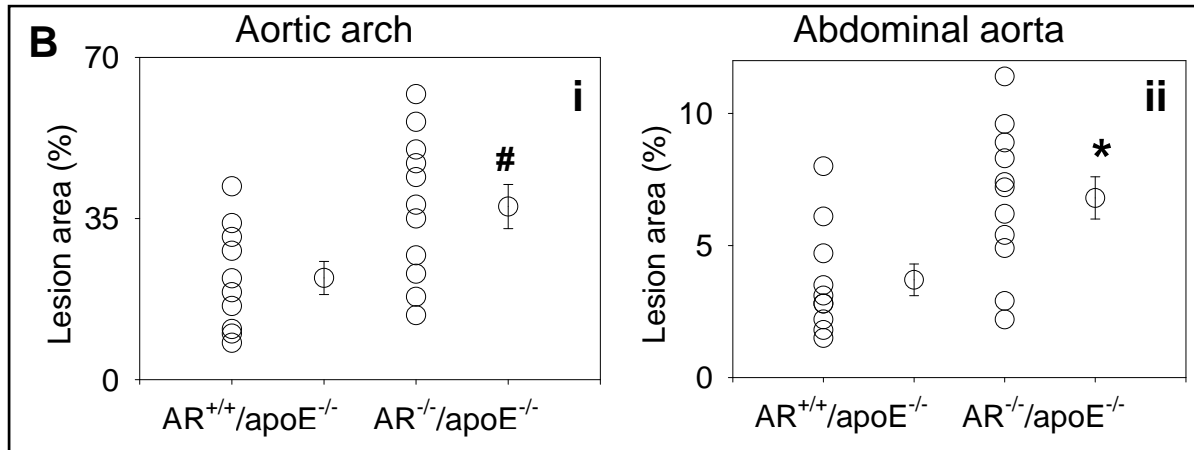

Supplement: NIHMS149483-supplement-01.pdf [file NIHMS149483-supplement-01.pdf]
